# Supplementary material for: Dullard-mediated Smad1/5/8 inhibition controls mouse cardiac neural crest cells condensation and outflow tract septation
Source: eLife. 2020 Feb 27;9:e50325. doi: 10.7554/eLife.50325 (PMC7069721; doi:10.7554/eLife.50325)
Supplement: Supplementary file 1. [file elife-50325-supp1.xlsx]

## Sheet: Sheet1
	Gene Symbol	Gene ID	Dye	Assay ID
	Nkx2-5	18091	FAM-MGB	Mm01309813_s1
	Myh6	17888	FAM-MGB	Mm00440359_m1
	Gja1	14609	FAM-MGB	Mm00439105_m1
	Acta2	11475	FAM-MGB	Mm01546133_m1
	Myh11	17880	FAM-MGB	Mm00443013_m1
	Snai2	20583	FAM-MGB	Mm00441531_m1
	Twist1	22160	FAM-MGB	Mm04208233_g1
	Postn	50706	FAM-MGB	Mm00450111_m1
	Kdr	16542	FAM-MGB	Mm01222421_m1
	Flt1	14254	FAM-MGB	Mm01210866_m1
	Nfatc1	18018	FAM-MGB	Mm00479445_m1
	Tek	21687	FAM-MGB	Mm00443243_m1
	Fn1	14268	FAM-MGB	Mm01256744_m1
	Tbx1	21380	FAM-MGB	Mm00448949_m1
	Isl1	16392	FAM-MGB	Mm00517585_m1
	Tcf21	21412	FAM-MGB	Mm00448961_m1
	Wt1	22431	FAM-MGB	Mm01337048_m1
	Ctdnep1	67181	FAM-MGB	Mm00835314_g1
	Bmp4	12159	FAM-MGB	Mm00432087_m1
	Id1	15901	FAM-MGB	Mm00775963_g1
	Id2	15902	FAM-MGB	Mm00711781_m1
	Msx1	17701	FAM-MGB	Mm00440330_m1
	Msx2	17702	FAM-MGB	Mm00442992_m1
	Six2	20472	FAM-MGB	Mm03003557_s1
	Sema3c	20348	FAM-MGB	Mm00443121_m1
	Nrp1	18186	FAM-MGB	Mm00435379_m1
	Plxna2	18845	FAM-MGB	Mm00801930_m1
	Plxnd1	67784	FAM-MGB	Mm01184367_m1
	Hspg2	15530	FAM-MGB	Mm01181173_g1
	sox9	20682	FAM-MGB	Mm00448840_m1
	Acan	11595	FAM-MGB	Mm00545794_m1
	Col2a1	12824	FAM-MGB	Mm01309565_m1
	Mmp14	17387	FAM-MGB	Mm00485054_m1
	Mmp2	17390	FAM-MGB	Mm00439498_m1
	Adamts1	11504	FAM-MGB	Mm01344169_m1
	Adamts5	23794	FAM-MGB	Mm00478620_m1
	Cdh2	12558	FAM-MGB	Mm01162497_m1
	Cdh5	12562	FAM-MGB	Mm00486938_m1
	RhoA	11848	FAM-MGB	Mm00834507_g1
	Rac1	19353	FAM-MGB	Mm01201653_mH
	Klf2	16598	FAM-MGB	Mm00500486_g1
	Gapdh	14433	FAM-MGB	Mm99999915_g1
	Hprt	15452	FAM-MGB	Mm03024075_m1
	Actb	11461	FAM-MGB	Mm02619580_g1
	Vim	22352	FAM-MGB	Mm01333430_m1
	Vegfa	22339	FAM-MGB	Mm00437306_m1
	Stat3	20848	FAM-MGB	Mm01219775_m1
	Dullard	67181	FAM-MGB	GCAGATCCGCACGGTAATTC	query_L1
	Dullard	67181	FAM-MGB	GTTTCGTCCAGATCCAGCAC	query_R1
	Dullard	67181	FAM-MGB	CCCGGAATCGCCTAGCCCAGGT	query_P1
