# Supplementary figures and images for: Dullard-mediated Smad1/5/8 inhibition controls mouse cardiac neural crest cells condensation and outflow tract septation
Source: eLife journal article supplement (doi:10.7554/elife.50325), 2020-02-27

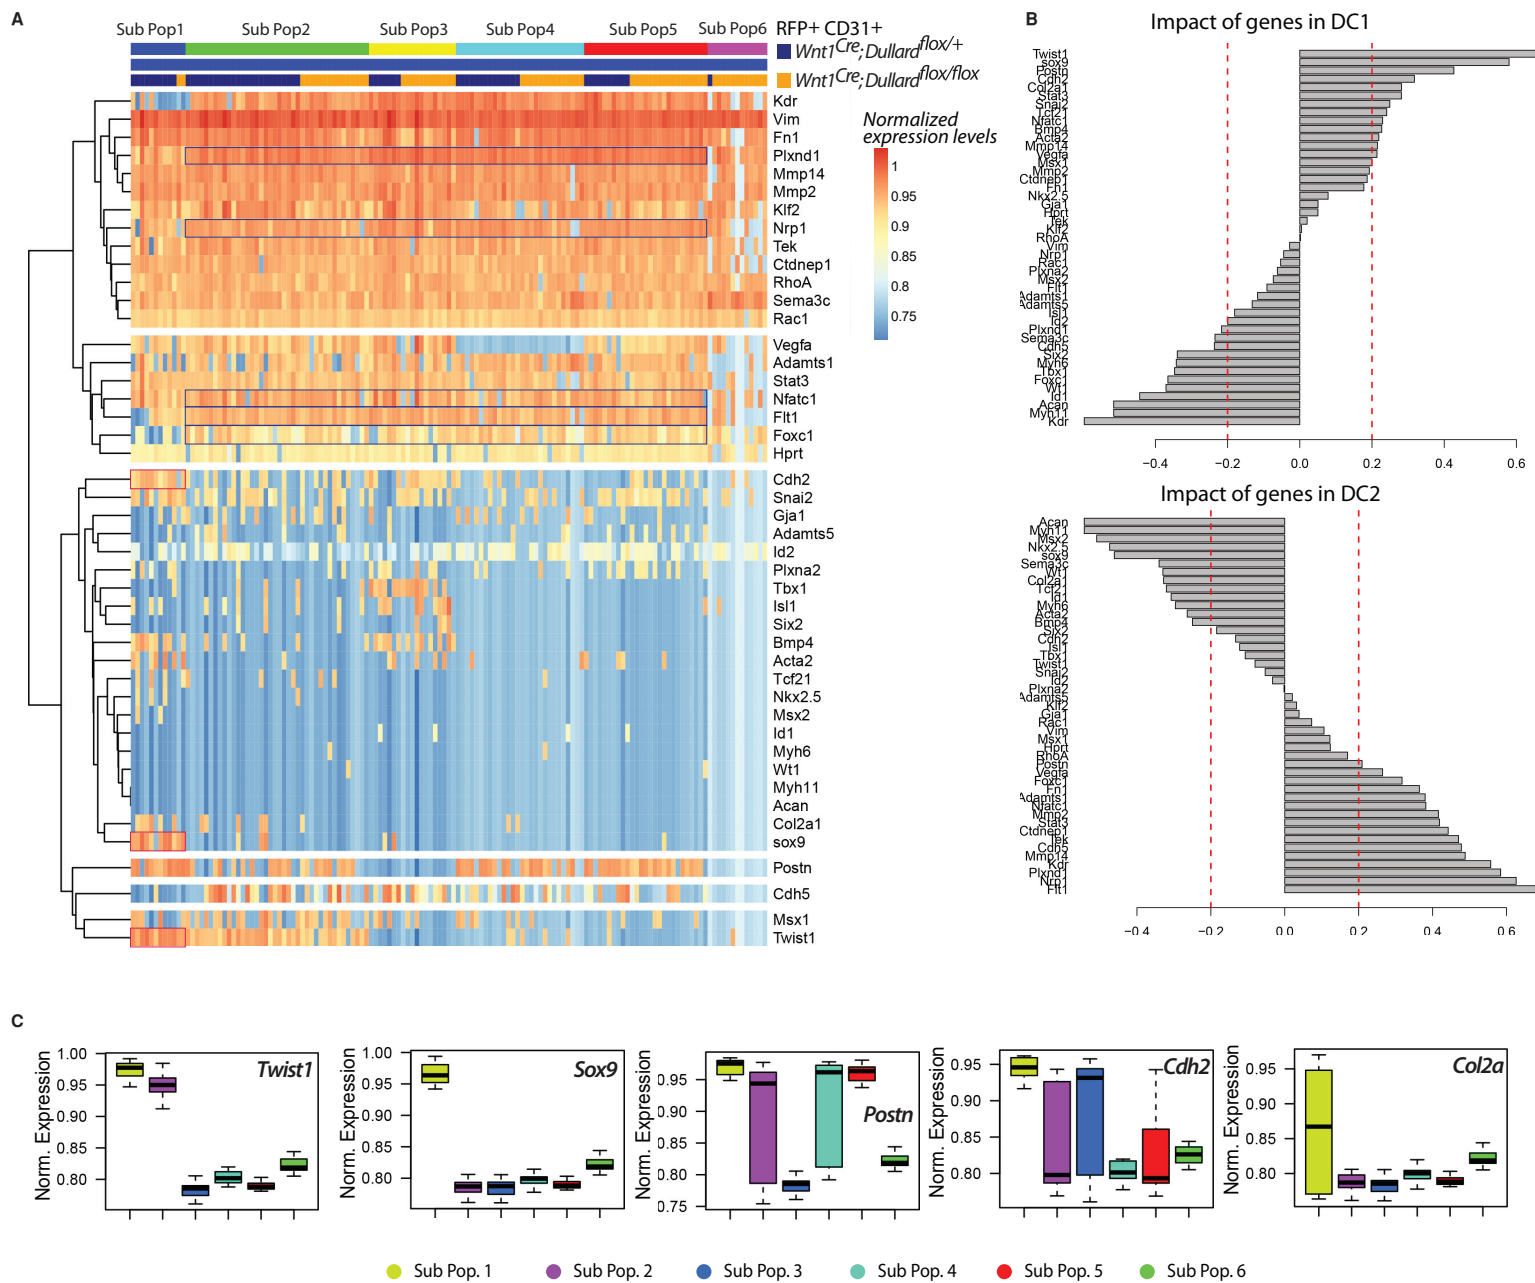

Darrigrand et al., Figure 5 - Figure supplement 1

Supplement: supp [file elife-50325-supp-v1.zip]

**A**

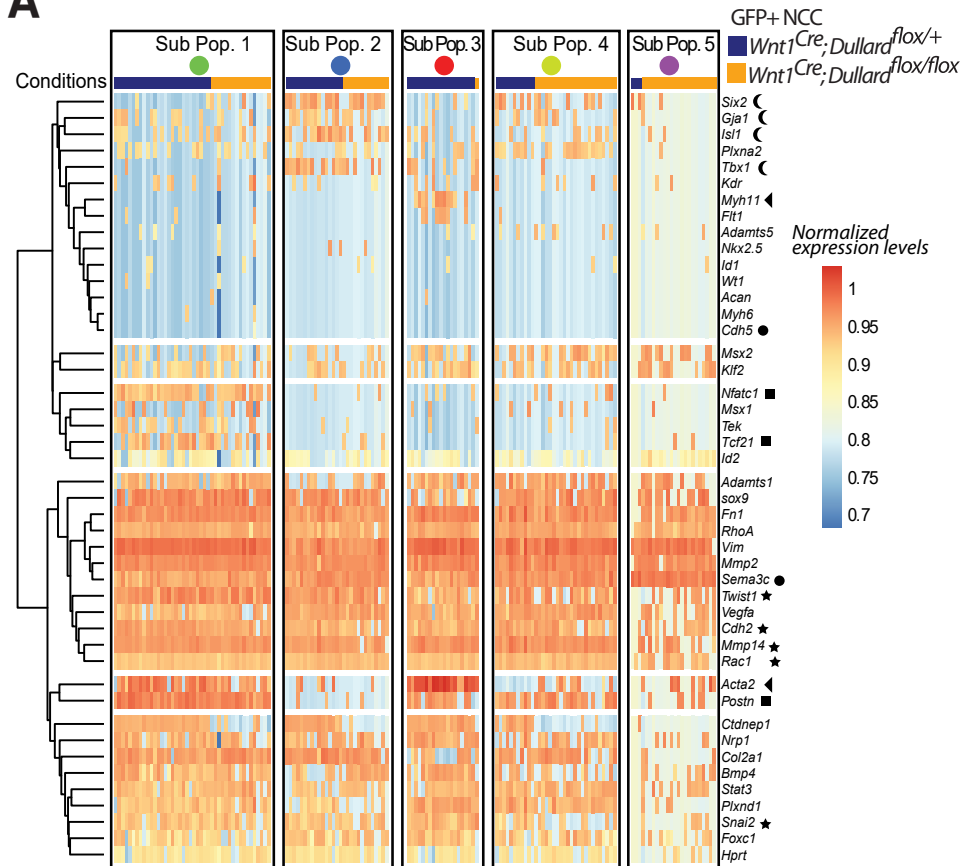

**B**

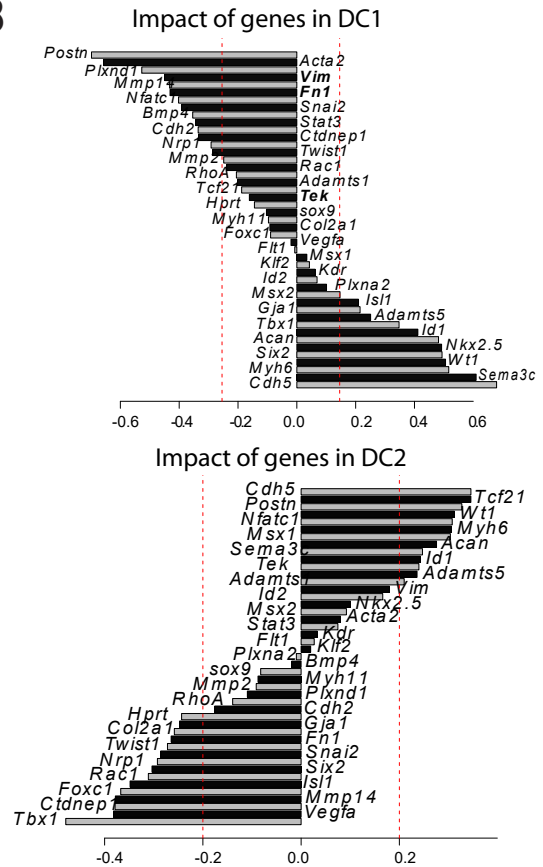

**C**

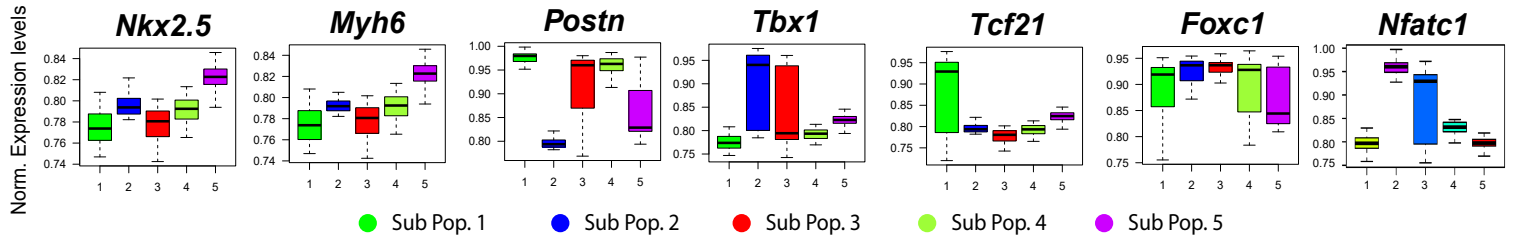

Supplement: supp [file elife-50325-supp-v1.zip]

**A**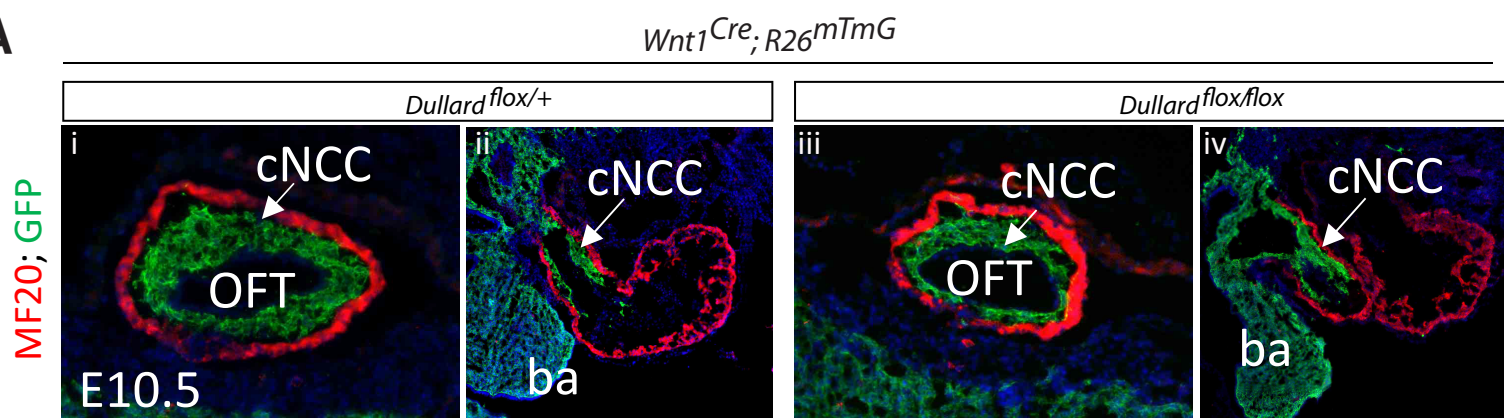**B**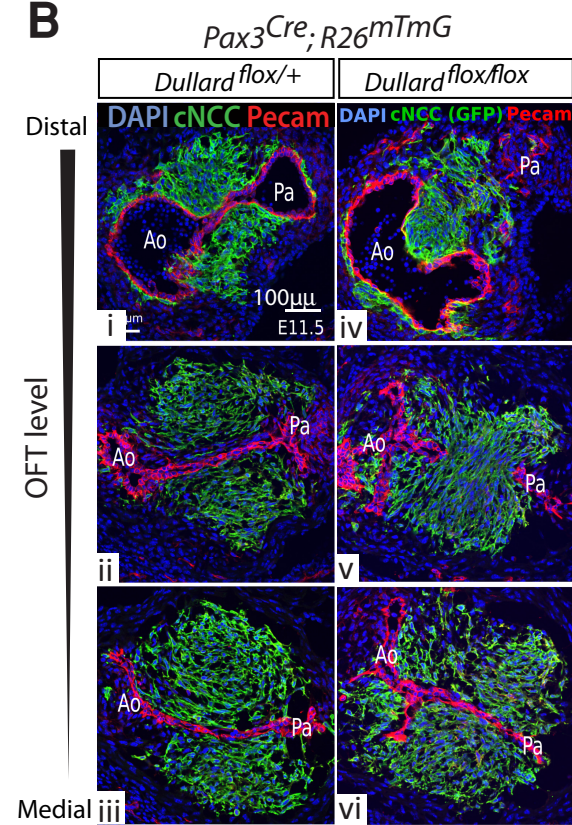**C**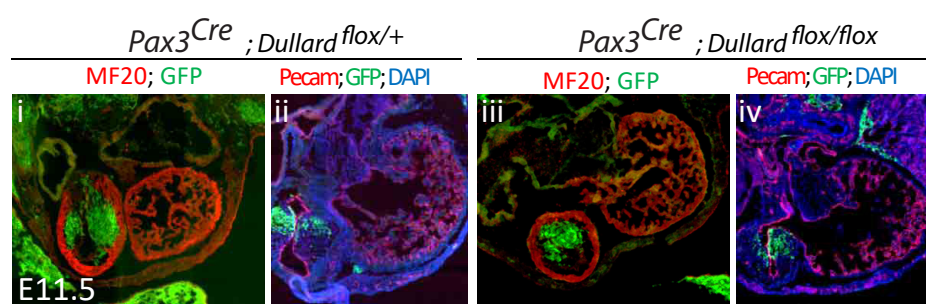**D**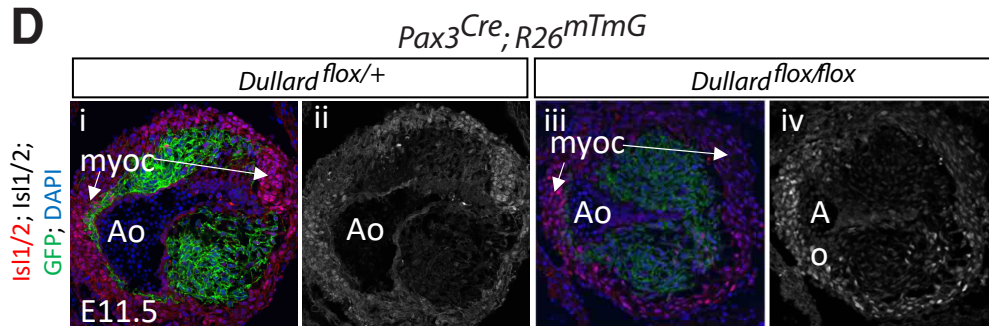

Supplement: supp [file elife-50325-supp-v1.zip]

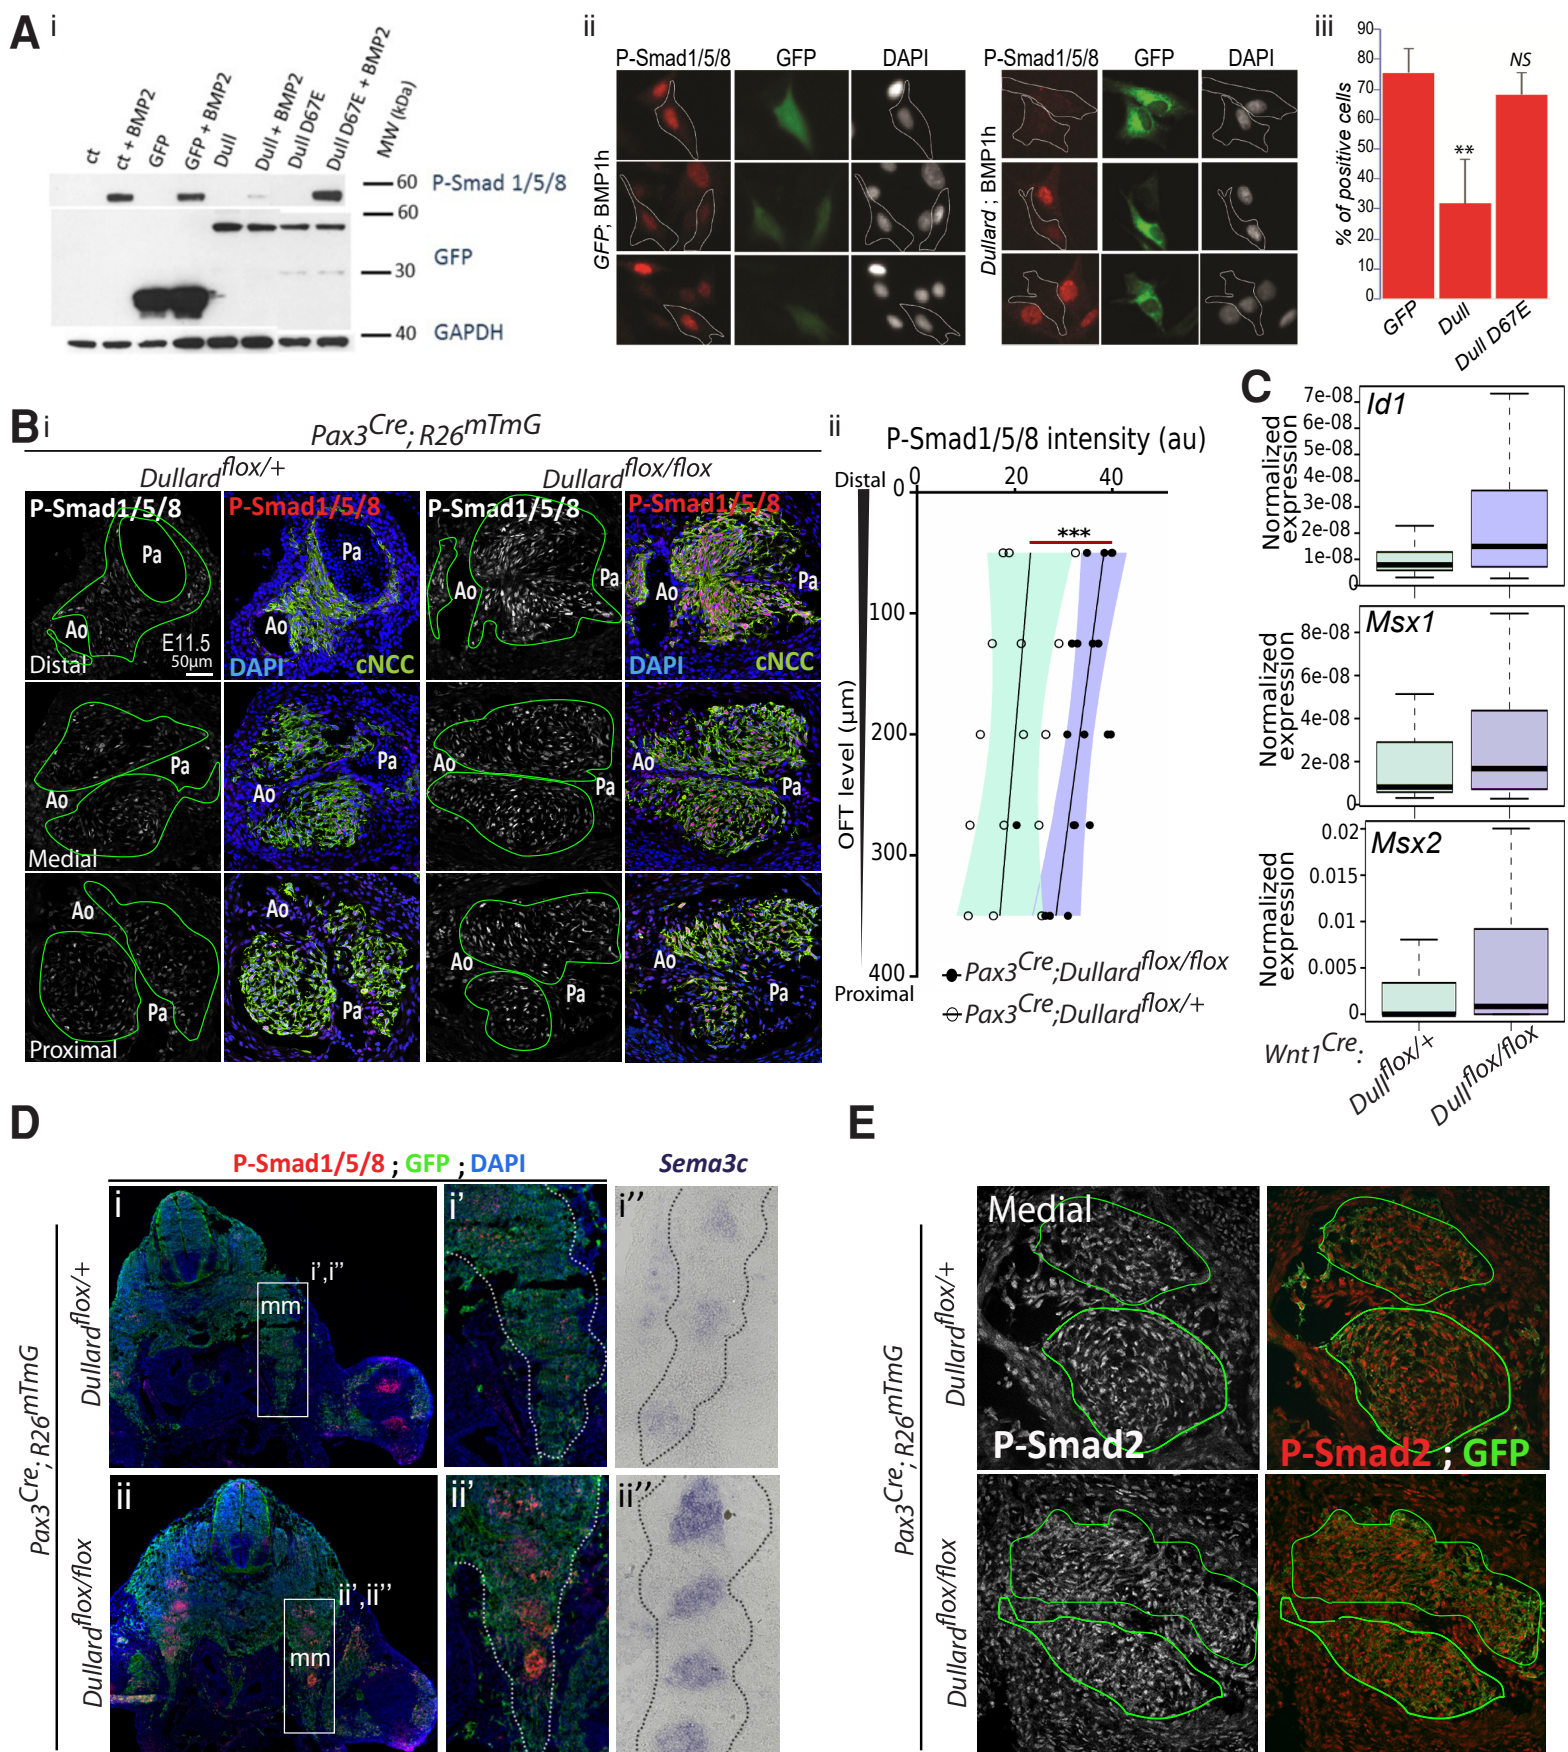

Supplement: supp [file elife-50325-supp-v1.zip]

**A**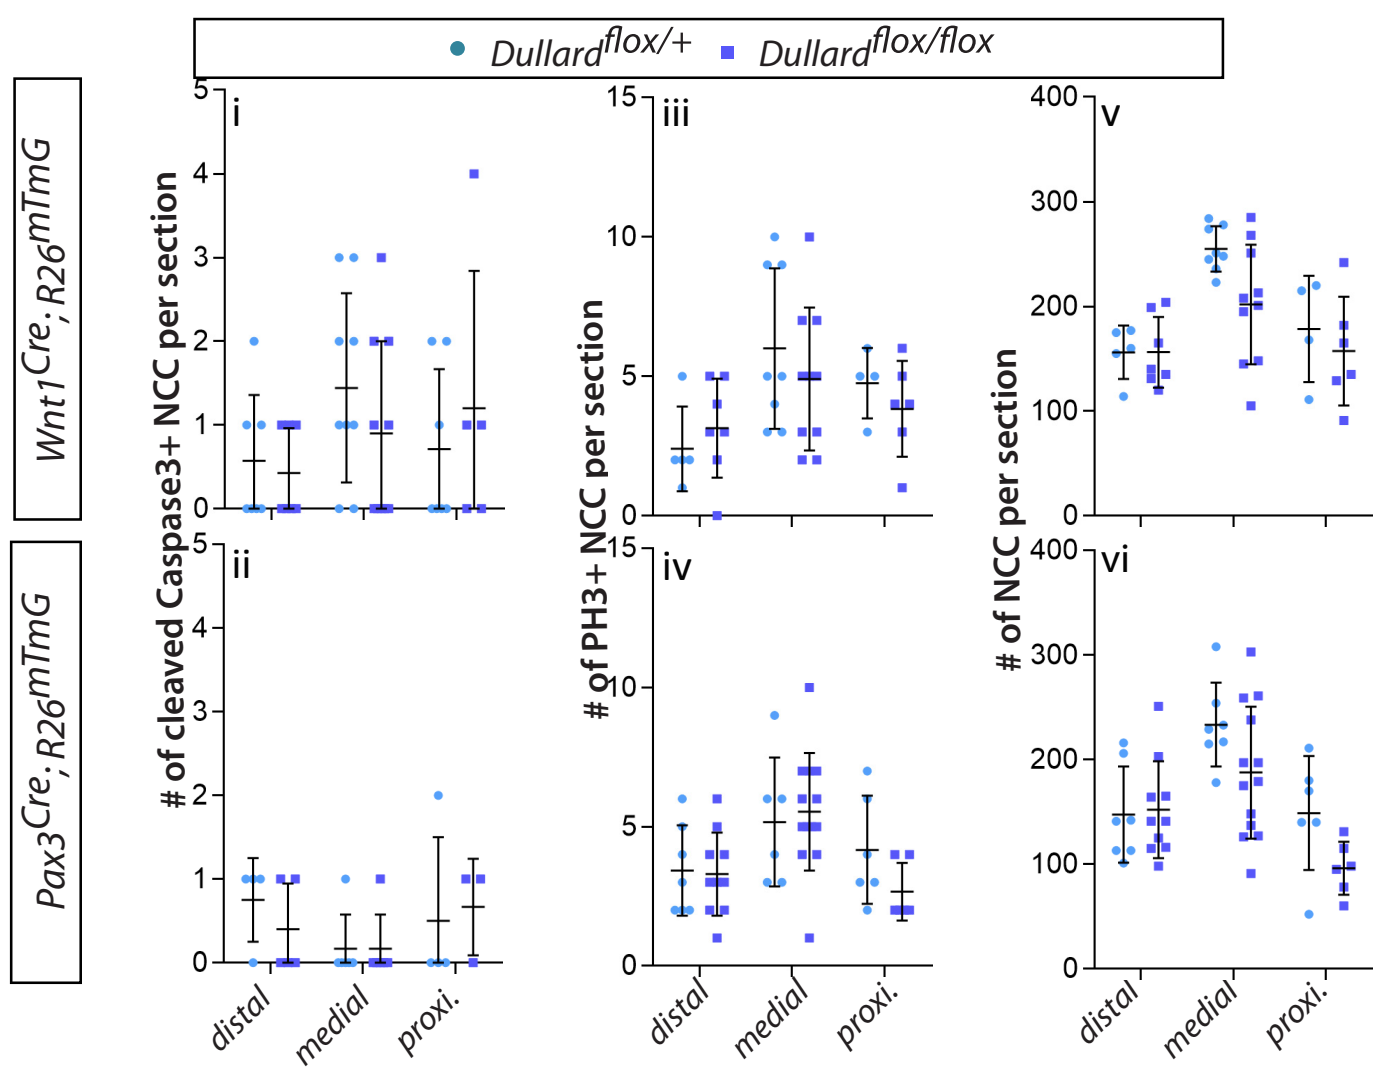**B**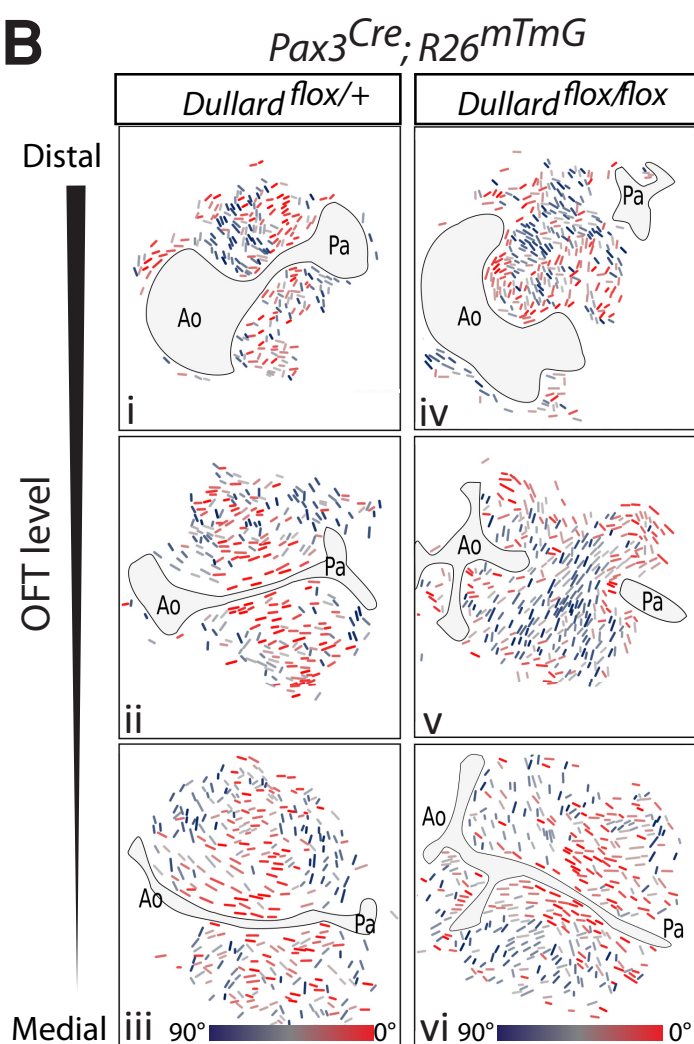**C**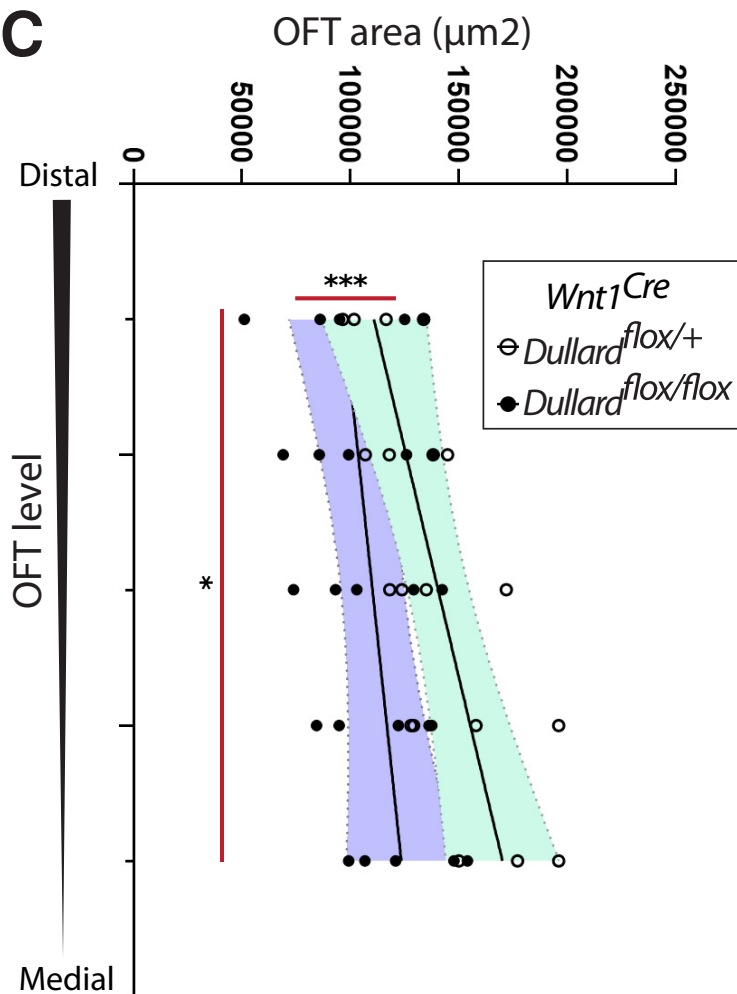

Supplement: supp [file elife-50325-supp-v1.zip]

A

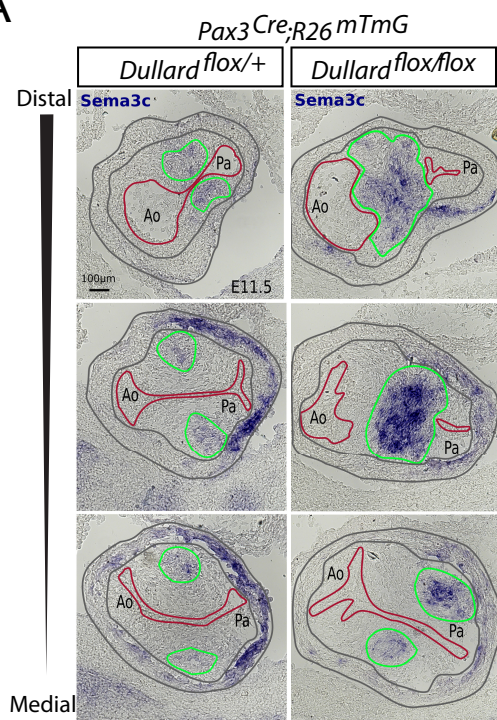

B

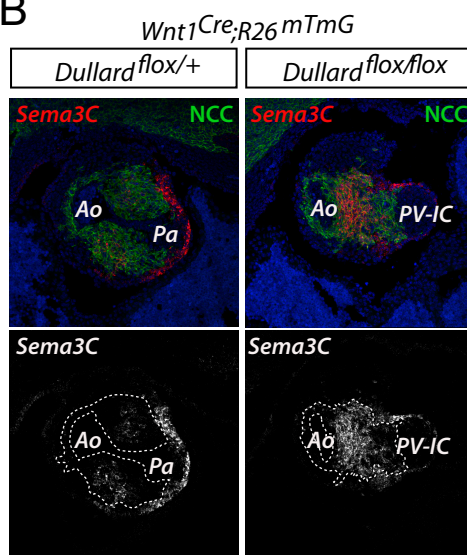

Darrigrand et al., Figure 6 - Figure supplement 1

Supplement: supp [file elife-50325-supp-v1.zip]
